# Supplementary material for: TMEM229A suppresses non-small cell lung cancer progression via inactivating the ERK pathway
Source: PubMed Central journal article supplement — Oncol Rep. 2021 Jun 29;46(2):176. doi: 10.3892/or.2021.8127 (PMC8261197; doi:10.3892/or.2021.8127), 2021-06-29

Figure S1. TMEM229A knockdown promotes H1299 cell proliferation, migration and invasion *in vitro*. (A) mRNA expression level of TMEM229A was detected via reverse transcription-quantitative PCR in H1299 cells. (B) Western blot analysis of TMEM229A expression in H1299 cells. (C and D) Cell proliferation was detected using Cell Counting Kit-8 and RTCA assays in H1299 cells. (E-G) Migration and invasion were measured using RTCA and Transwell assays in H1299 cells. \* $P < 0.05$ , \*\* $P < 0.01$  and \*\*\* $P < 0.001$ . TMEM229A, transmembrane protein 229A; NSCLC, non-small cell lung cancer; RTCA, real-time cellular analysis; si-Ctrl, scrambled siRNA; si-, small interfering.

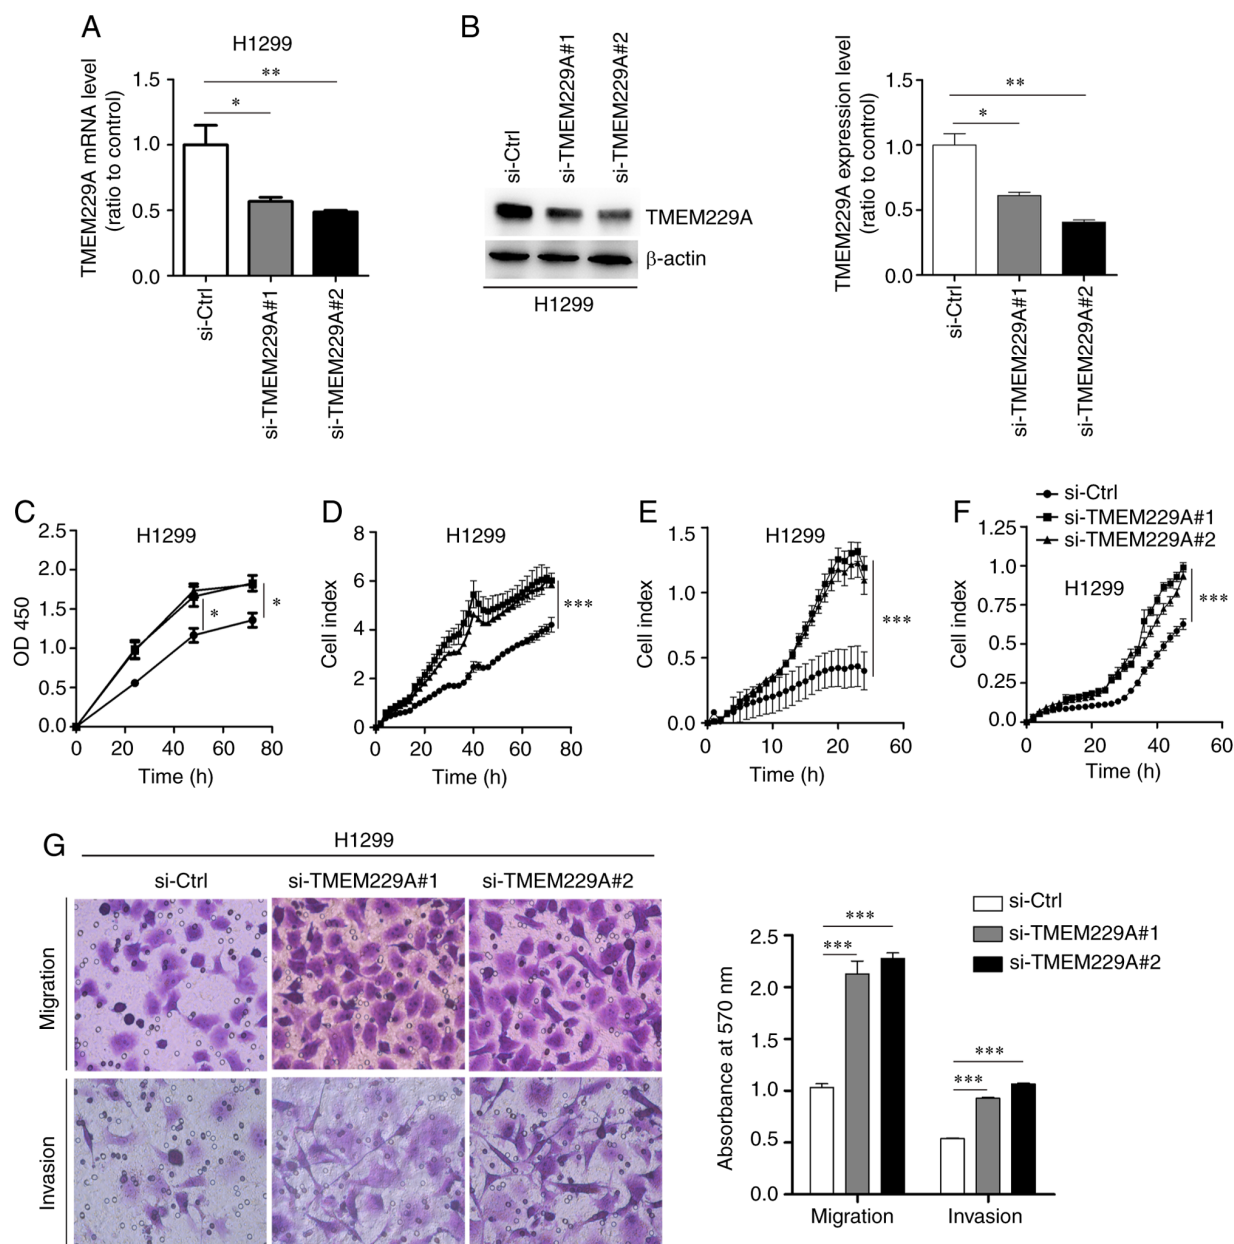

Figure S2. TMEM229A does not affect p-p38, p-JNK and p-p65 expression levels. Western blotting examination of p-p38, p-JNK and p-p65 expression after TMEM229A overexpression. TMEM229A, transmembrane protein 229A; OE, overexpressed; p-, phosphorylated.

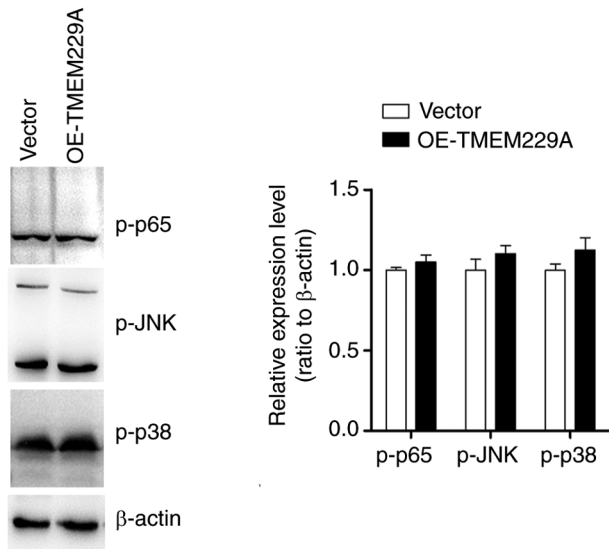

Supplement: Supplementary_Data.pdf [file Supplementary_Data.pdf]
